# Supplementary material for: Structural Preferences Shape the Entropic Force of Disordered Protein Ensembles
Source: PubMed Central journal article supplement (PMC10201532; doi:10.1021/acs.jpcb.3c00698), 2023-05-08
Supplement: jp3c00698_si_001.pdf [file jp3c00698_si_001.pdf]

Supporting Information for Publication:

# Structural Preferences Shape the Entropic Force of Disordered Protein Ensembles

Feng Yu<sup>1</sup> and Shahar Sukenik<sup>1,2,\*</sup>

1. Quantitative Systems Biology Program, University of California, Merced, California, United States, 95343
2. Department of Chemistry and Biochemistry, University of California, Merced, California, United States, 95343

\* correspondence to: [ssukenik@ucmerced.edu](mailto:ssukenik@ucmerced.edu)

Figure S1

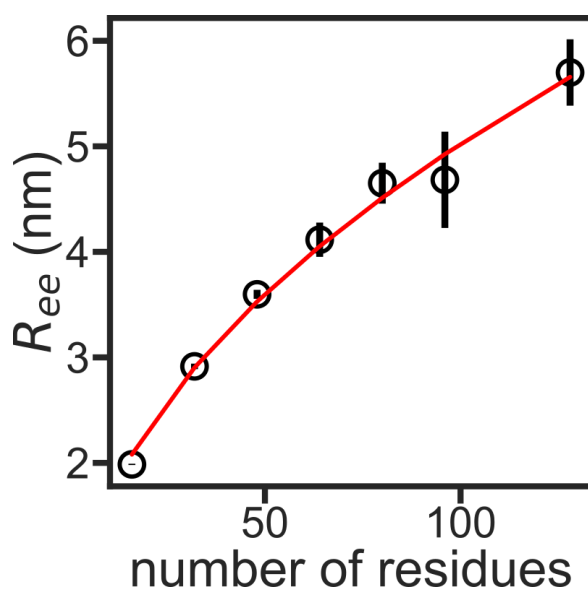

**Figure S1. GS repeats match homopolymer scaling law under buffer conditions.** The average end-to-end distance from five repeats vs the total number of residues for a series of Gly-Ser repeats, The error bars are the standard deviation of the five repeats. The red curve is the result of fitting to  $R_{ee} = R_0 N^\nu$ , with  $R_0 = 0.55 \pm 0.06$  nm and  $\nu = 0.48 \pm 0.03$ . Errors are obtained from the fit.

**Figure S2**

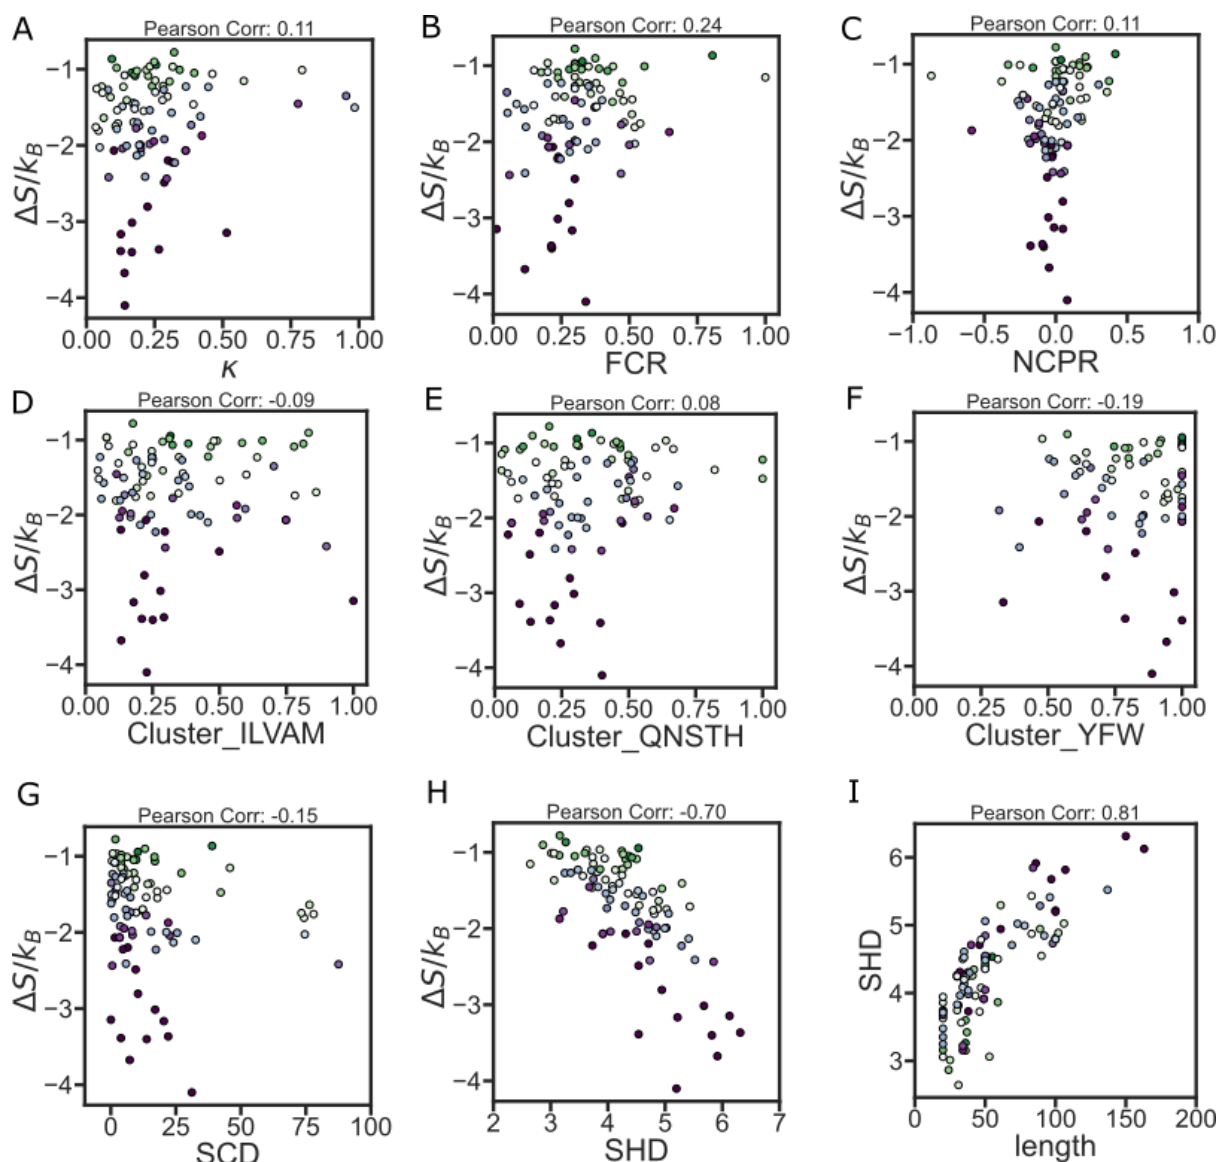

**Figure S2. Sequence features correlated with the entropic force strength.** The entropic force strength is plotted vs several sequence features. Unless stated otherwise, all sequence features are calculated using the localCIDER python package. (A)  $\kappa$ : a metric for mixing of charged amino acids<sup>18</sup> (B) FCR: fraction of charged residues, (C) NCPR: net charge per residue, (D) Cluster\_ILVAM: hydrophobic amino acid mixing calculated using the same algorithm as  $\kappa$ , (E) Cluster\_QNSTH: polar amino acid mixing calculated using the same algorithm as  $\kappa$ , (F) Cluster\_YFW, aromatic amino acid mixing calculated using the same algorithm as  $\kappa$ . (G) SCD: sequence charge decoration<sup>19</sup> (H) SHD: sequence hydropathy decoration<sup>21</sup> (I) SHD vs sequence length shows a strong correlation with the sequence length. This may explain at least some of the correlation with entropic force, which is also shown to correlate with sequence length (Fig. 5A).

**Figure S3**

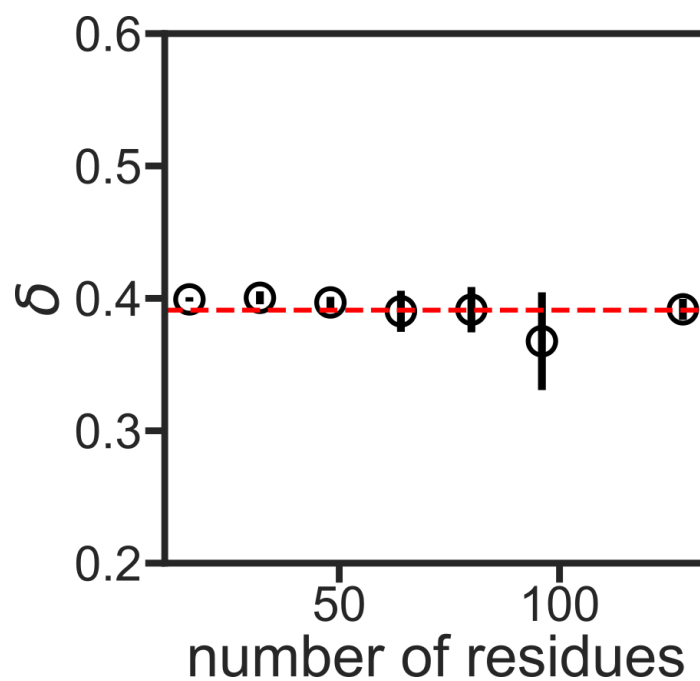

**Figure S3. GS repeat asphericity is independent of length.** The average asphericity of GS repeats vs the number of residues in the sequence. The mean of all seven data points is shown by the red line, with  $\delta = 0.39 \pm 0.01$ .

Figure S4

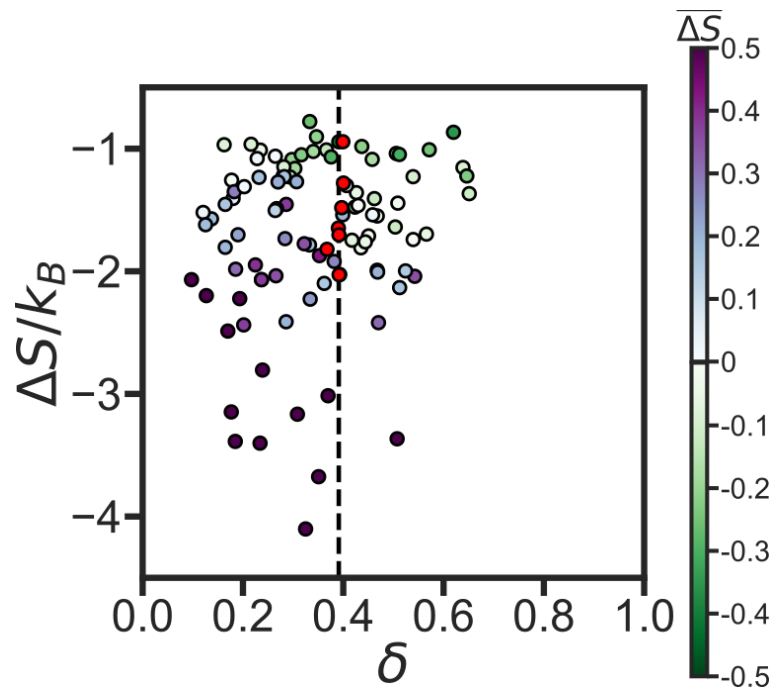

**Figure S4.** Entropic force as a function of average asphericity. The black line represents the length-independent asphericity of GS repeats shown in **Fig. S3**. Each marker represents a single IDR, color-coded as in **Fig. 5A**, with stronger purple (green) markers showing a stronger (weaker) entropic force compared to the GS repeat of the same size.
